# Supplementary material
Source: PubMed Central journal article supplement (PMC5241026)
Supplement: NIHMS839270-supplement-01.pdf [file NIHMS839270-supplement-01.pdf]

## Supplementary Materials for

### **RhoA inhibits neural differentiation in murine stem cells through multiple mechanisms**

Junning Yang, Chuanshen Wu, Ioana Stefanescu, Lars Jakobsson, Inna Chervoneva, Arie Horowitz\*

\*Corresponding author. Email: arie.horowitz@jefferson.edu

Published 26 July 2016, *Sci. Signal.* **9**, ra76 (2016)

DOI: 10.1126/scisignal.aaf0791

#### **This PDF file includes:**

Fig. S1. Comparisons of gene expression patterns and GTP-RhoA abundance in *Syx*<sup>-/-</sup> EBs or mESCs, respectively, versus their *Syx*<sup>+/+</sup> counterparts.

Fig. S2. Transfection of RFP-*Syx* or GFP-CA-RhoA into *Syx*<sup>-/-</sup> cells.

Fig. S3. Noggin production increased during neural differentiation, and VPA inhibited neural differentiation.

Fig. S4. Full-length images of the immunoblots shown in Figs. 1 to 7 and figs. S1 and S3.

Table S1. Primer sequences for qRT-PCRs.

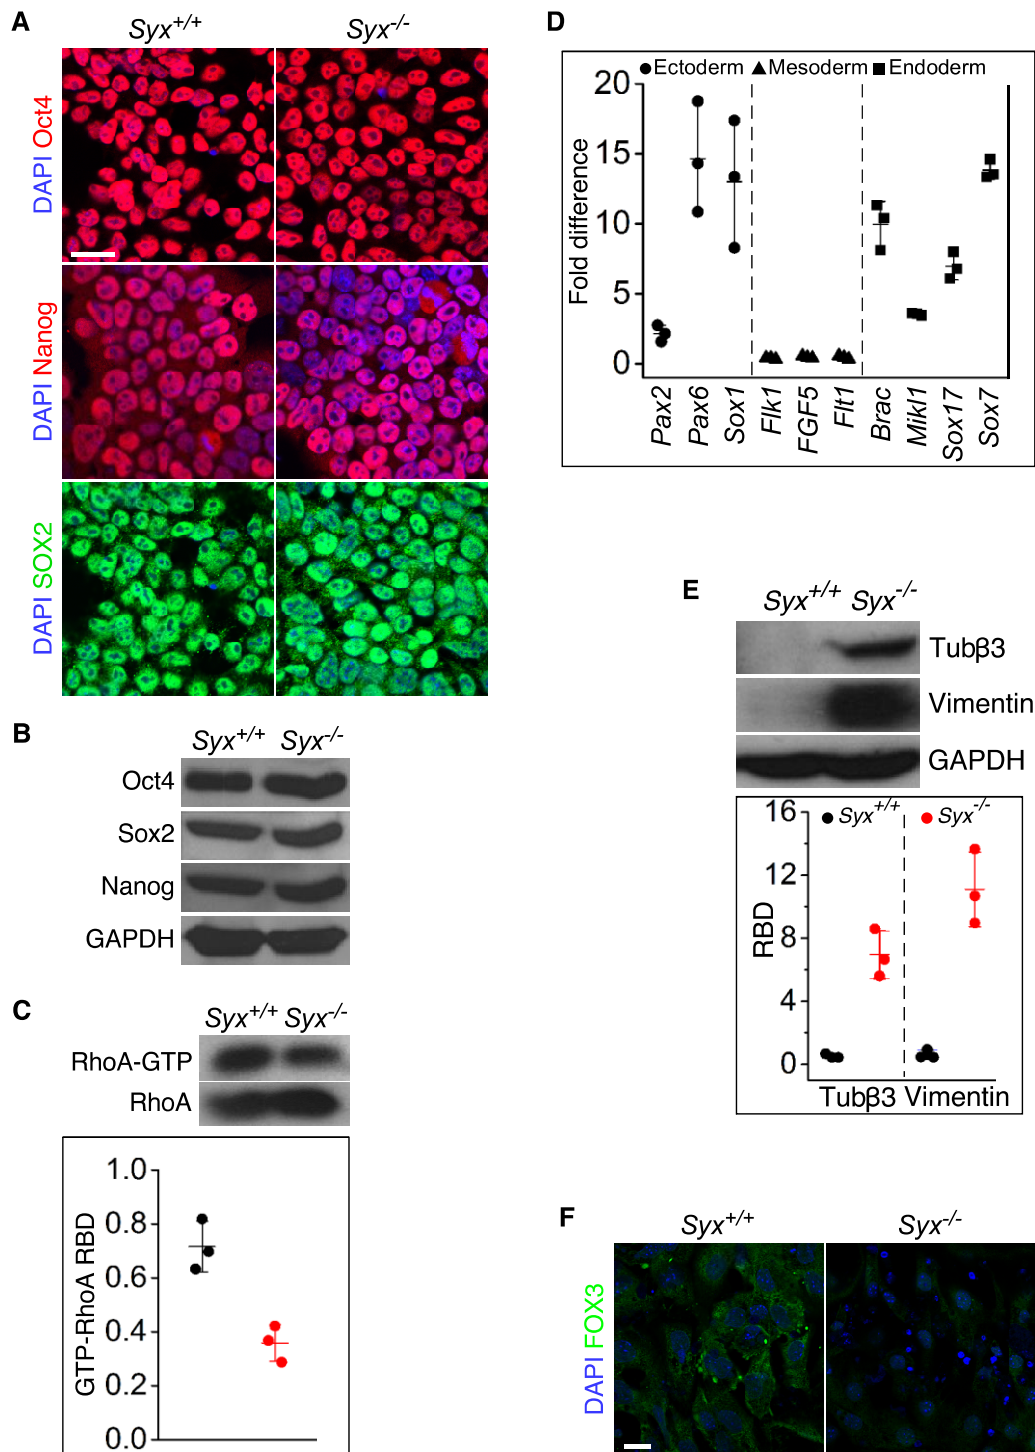

**Fig. S1. Comparisons of gene expression patterns and GTP-RhoA abundance in *Syx*<sup>-/-</sup> EBs or mESCs, respectively, versus their *Syx*<sup>+/+</sup> counterparts.** (A) Immunofluorescence images showing the core pluripotency transcription factors Oct4, Nanog, and Sox2 in *Syx*<sup>+/+</sup> or *Syx*<sup>-/-</sup> mESCs (one of two independent experiments). (B) Immunoblots showing the same transcription factors as in A (one of two independent experiments). (C) Immunoblots of RhoA-GTP and of total RhoA in *Syx*<sup>+/+</sup> and *Syx*<sup>-/-</sup> mESCs (two sample *t*-test, equal variance, mean ± SD, *n* = 3 independent experiments, *P* = 0.006). (D) qRT-PCR measurements of the mRNA abundances of the indicated markers of ectodermal, mesodermal, and endodermal

lineages, presented as fold difference of  $Syx^{-/-}$  relative to  $Syx^{+/+}$  cells from 13-day old RA-naïve EBs (n=3 replicates). (E) Immunoblots of EBs for the neuronal differentiation markers Tub $\beta$ 3 and Vimentin (two sample  $t$ -test, unequal variance, mean  $\pm$  SD, n = 3 independent experiments,  $P = 0.017$  for Tub $\beta$ 3,  $P = 0.015$  for Vimentin). (F) Immunofluorescence images of the neuronal cell marker FOX3 in RA-treated  $Syx^{+/+}$  or  $Syx^{-/-}$  mESCs (one of two independent experiments).

**A** RFP-Syx expression

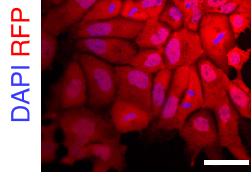

**B** GFP-CA-RhoA Expression

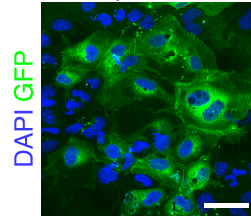

**Fig. S2. Transfection of RFP-Syx or GFP-CA-RhoA into *Syx*<sup>-/-</sup> cells.** Immunofluorescence images showing the presence of either (A) RFP-Syx or (B) GFP-CA-RhoA (scale bars, 50  $\mu$ m) transfected into cells dissociated from RA-treated *Syx*<sup>-/-</sup> EBs 8 days post aggregation (one of two independent experiments is shown).

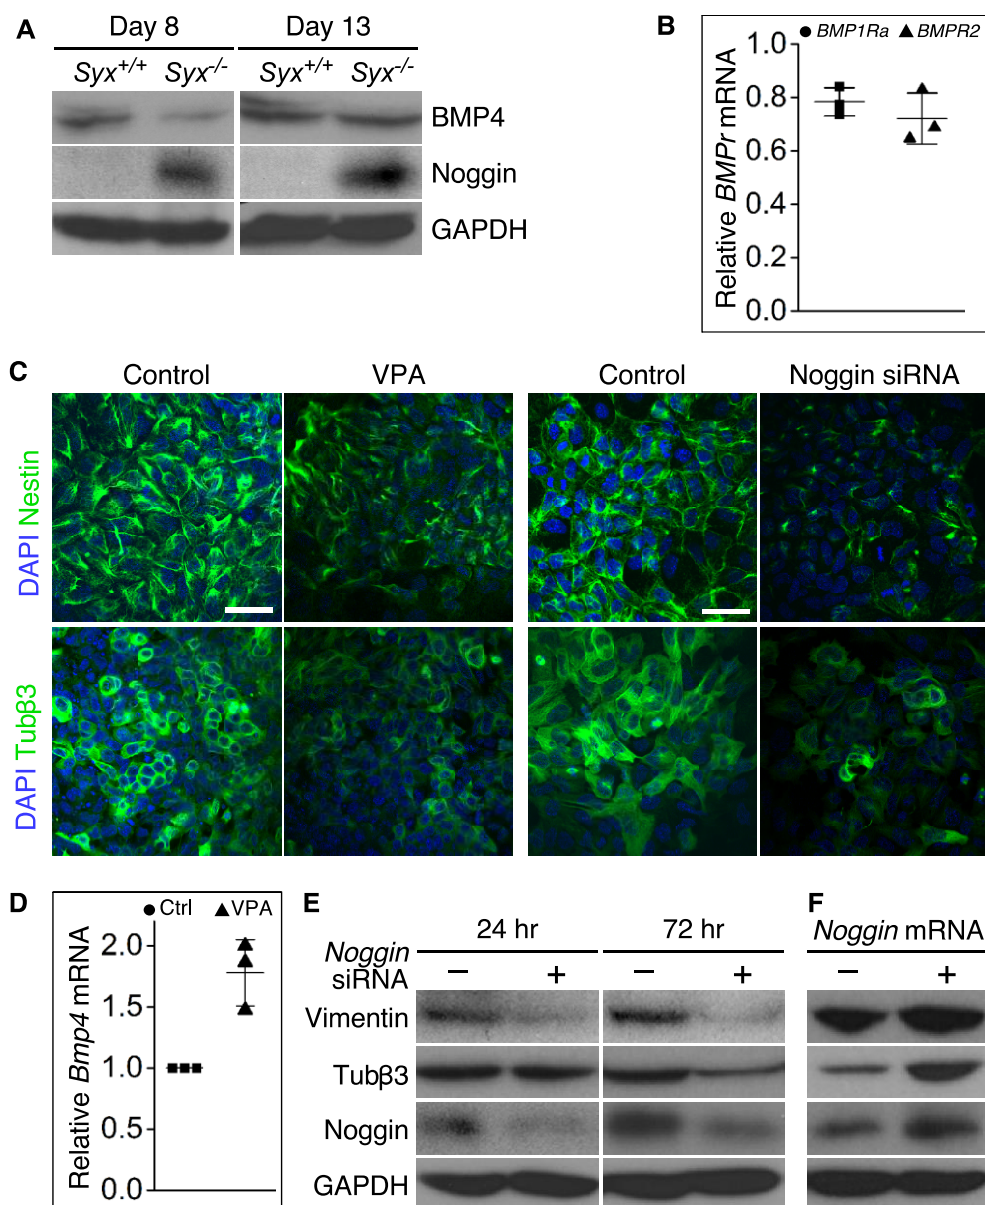

**Fig. S3. Noggin production increased during neural differentiation, and VPA inhibited neural differentiation.** (A) BMP4 and noggin abundances at the indicated time points after induction of differentiation in 8-day EBs treated with RA (one of two independent experiments). (B) qRT-PCR results showing that the expression of Bmp receptors BMPR1a and BMPR2 mRNA in 13-day *Syx*<sup>-/-</sup> EBs was not substantially different relative to *Syx*<sup>+/+</sup> EBs (n=3 replicates). (C) Immunofluorescence images showing the effect of 6-day VPA treatment or *Nog* silencing on neural marker expression in differentiating mESCs (scale bars, 50 μm) (one of two independent experiments). (D) qRT-PCR results showing the effect of 6-day 400 μM VPA treatment on *Bmp4* mRNA expression in 13-day *Syx*<sup>-/-</sup> EBs (two sample *t*-test, unequal variance, mean ± SD, n = 3 independent experiments, *P* = 0.008). (E) *Nog* silencing in *Syx*<sup>-/-</sup> cells dissociated from differentiating EBs 8 days post aggregation reduced the abundance of the neural differentiation markers vimentin and Tubβ3 (one of two independent experiments). (F) *Nog* transfection into *Syx*<sup>+/+</sup> cells dissociated from EBs 8 days post aggregation increased the abundance of the neural differentiation markers vimentin and Tubβ3 (one of two independent experiments).

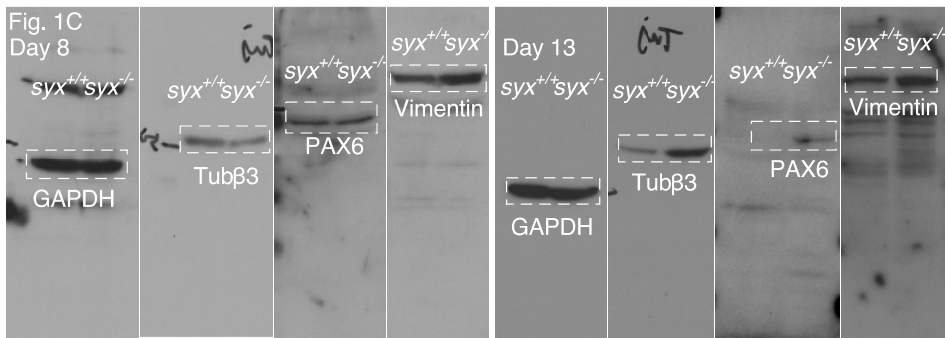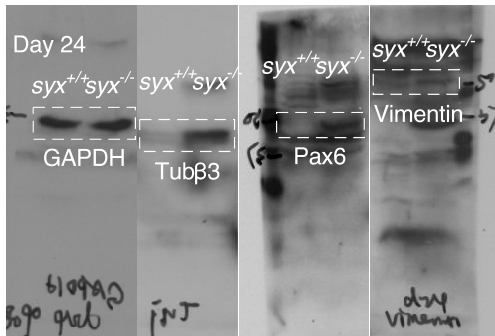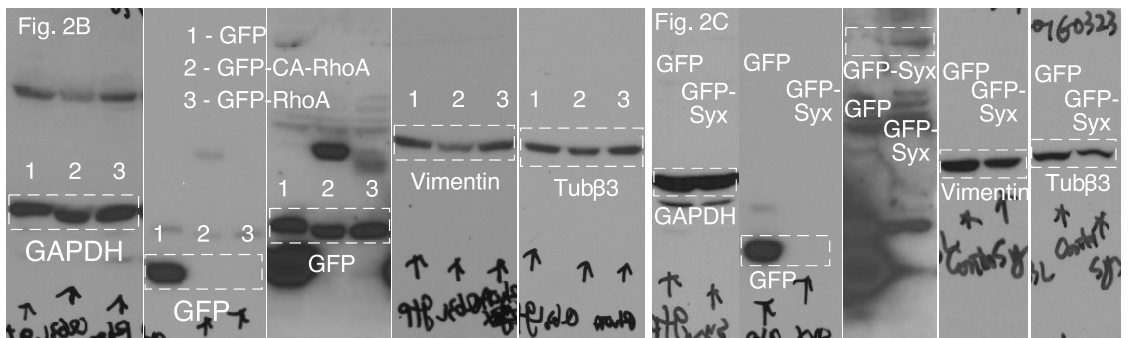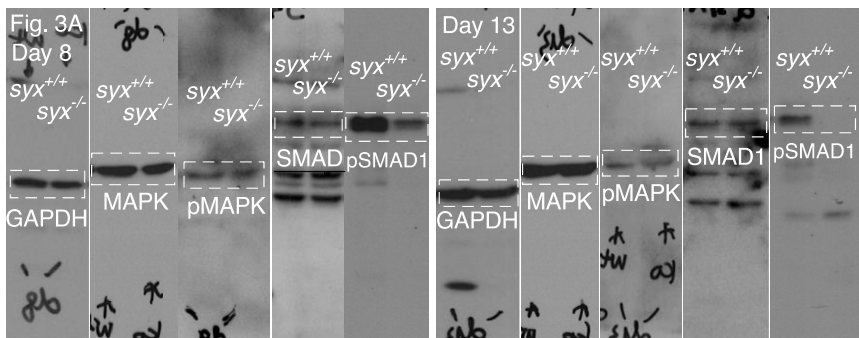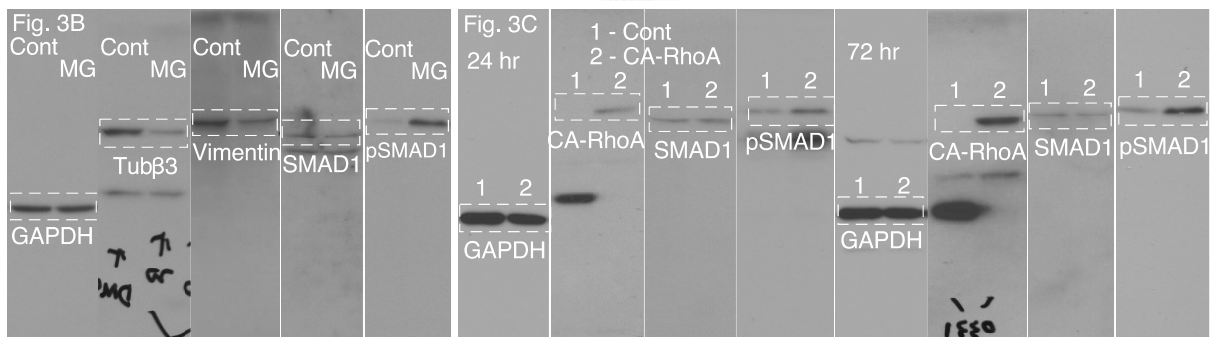

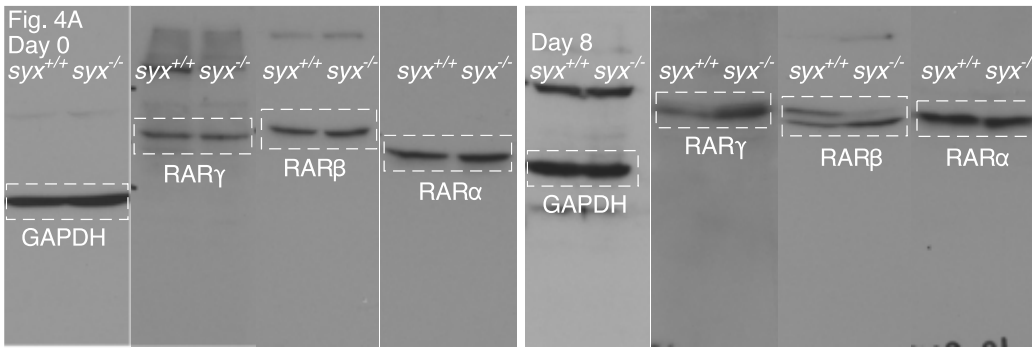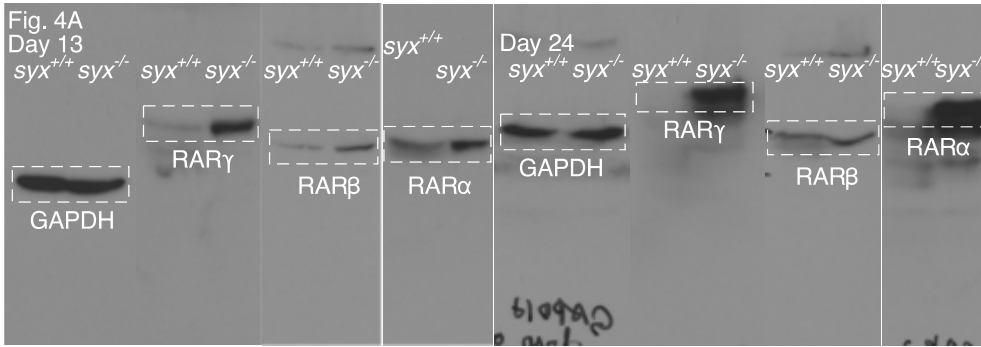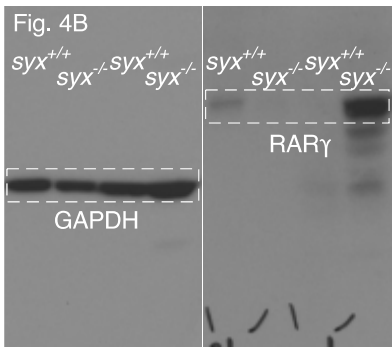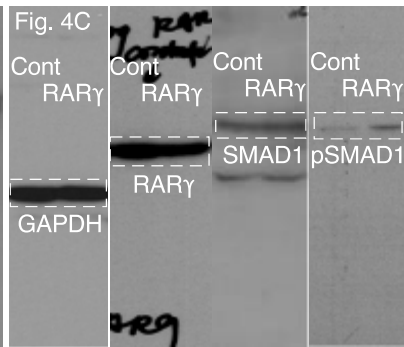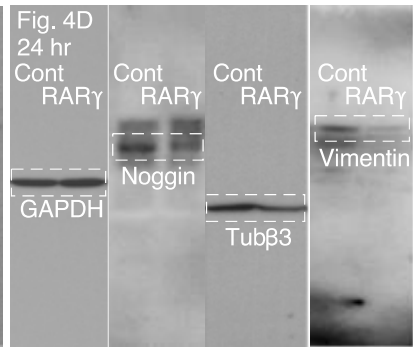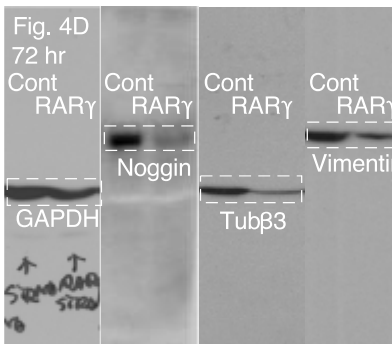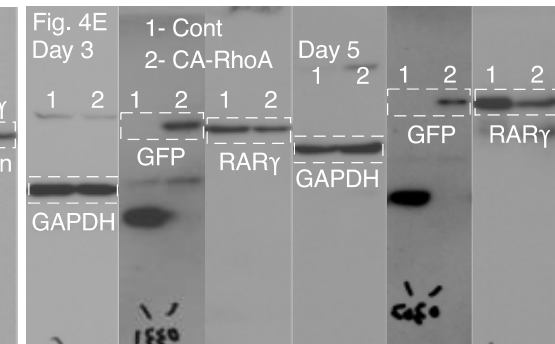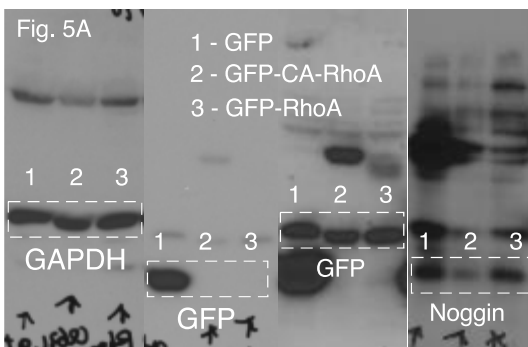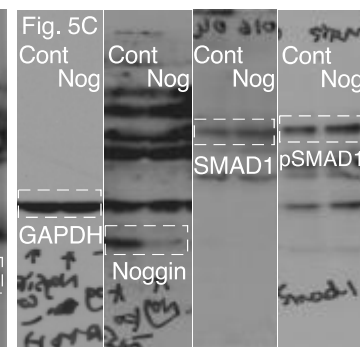



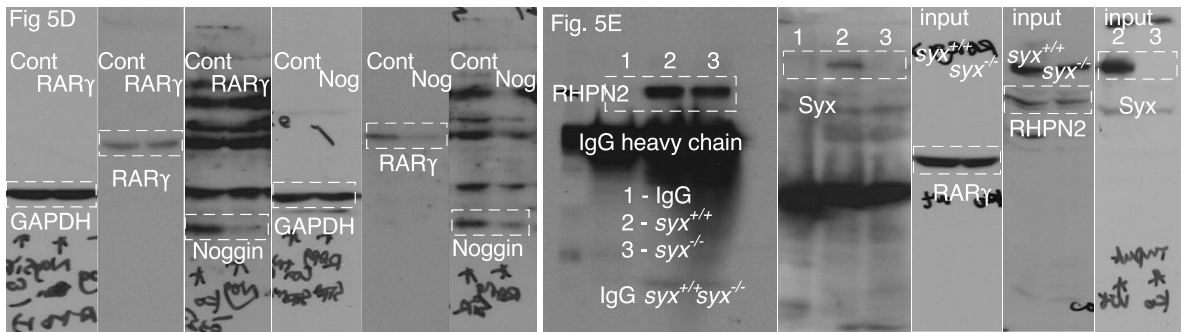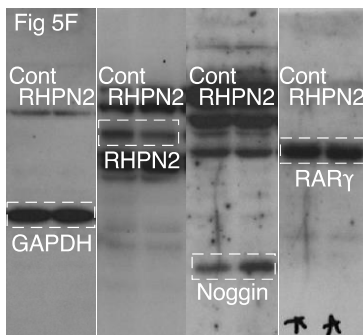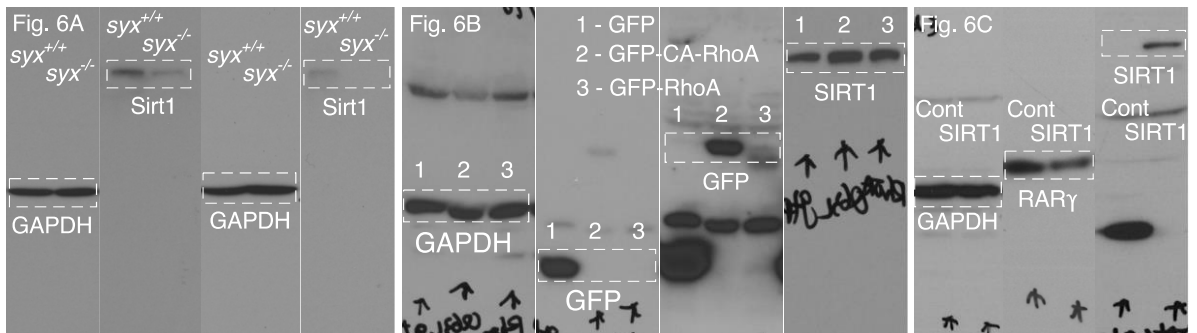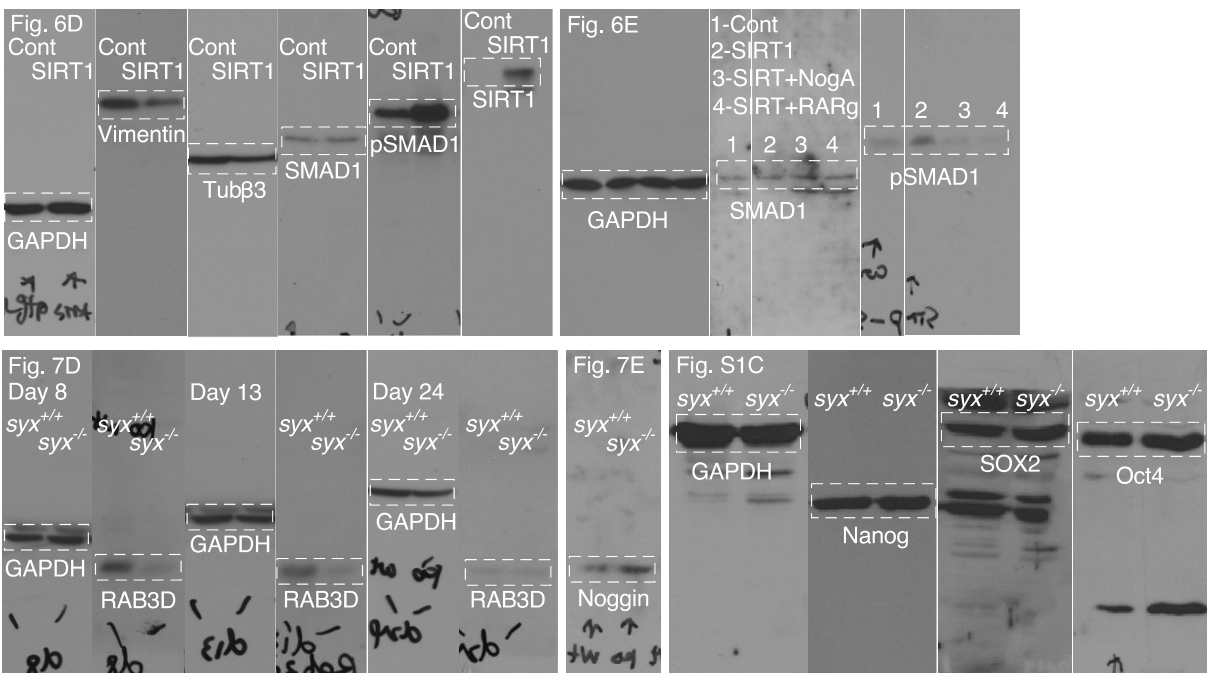



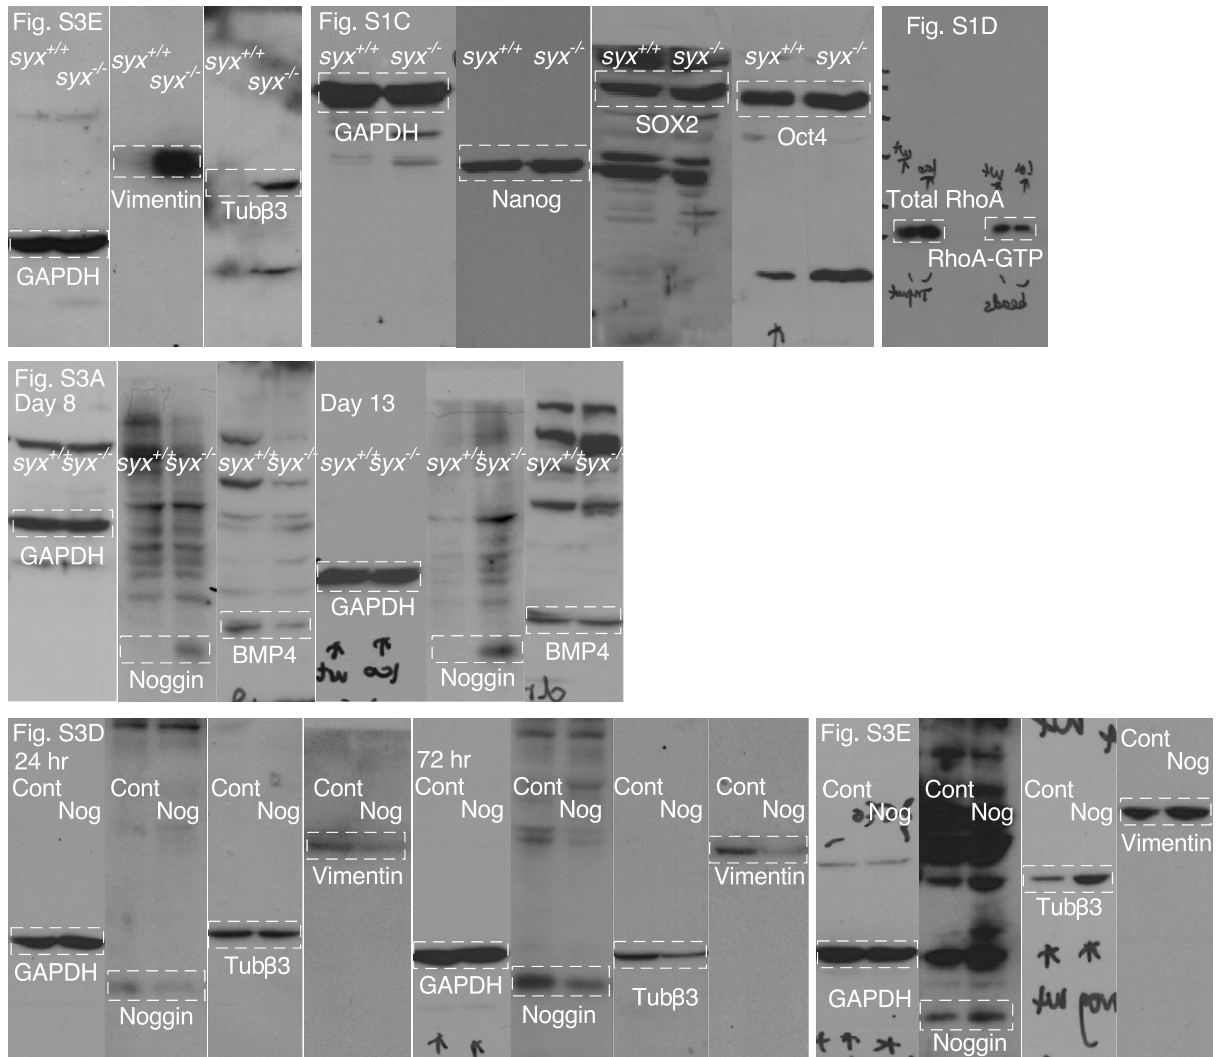

**Fig. S4. Full-length images of the immunoblots shown in Figs. 1 to 7 and figs. S1 and S3.** Lane identities are marked at the top; band identities appear under the frame surrounding the bands.

| Gene          | Primer sequence                    |
|---------------|------------------------------------|
| <i>Bmp4</i>   | F: 5'-TGCCATTGTGCAGACCCTAG-3'      |
|               | R: 5'-CACCACCTTGTCCATACTCATCCAG-3' |
| <i>Bmpr1a</i> | F: 5'-GGGAGAAATCAAAGGGGACA-3'      |
|               | R: 5'-AATTGAGGGTGGGGTGGTAGT-3'     |
| <i>Bmpr2</i>  | F: 5'-CCTATGAGGACATGCGTGAGGT-3'    |
|               | R: 5'-TGTGAGTCTGGAGGCTGGATTA-3'    |
| <i>Brac</i>   | F: 5'-GCGGACAATTCATCTGCTTG-3'      |
|               | R: 5'-AGTAGGTGGGCTGGCGTTAT-3'      |
| <i>Fgf5</i>   | F: 5'-CGTCTTCTGCCTCCTCACCA-3'      |
|               | R: 5'-AGTAGGTGGGCTGGCGTTAT-3'      |
| <i>Fgf8</i>   | F: 5'-ATGGCAGAAGACGGAGACCC-3'      |
|               | R: 5'-CTTGCCCTTGCCGTTGCTC-3'       |
| <i>Flkl</i>   | F: 5'-CCTGCCTACCTCACCTGTTT-3'      |
|               | R: 5'-GCTCTTTCGCTTACTGTTCTG-3'     |
| <i>Flt1</i>   | F: 5'-GGTCCTCGTTCAGTCTTTC-3'       |
|               | R: 5'-GTCTTCCTGCTGTGGTTTCC-3'      |
| <i>Foxa1</i>  | F: 5'-GTGGATCATGGACCTCTTCCC-3'     |
|               | R: 5'-CGTGCCACCTTGACGAAAC-3'       |
| <i>Gapdh</i>  | F: 5'-CCTTCCGTGTTCCCTACCCCC-3'     |
|               | R: 5'-AGCCCAAGATGCCCTTCAGT-3'      |
| <i>Mixl1</i>  | F: 5'-TTCCGACAGACCATGTACCCA-3'     |
|               | R: 5'-GGCTGAAATGACTTCCCCTCT-3'     |
| <i>Ngfr</i>   | F: 5'-CCAGAGCGAGACCTCATAGCC-3'     |
|               | R: 5'-CACAACCACAGCAGCCAAGAT-3'     |
| <i>Noggin</i> | F: 5'-CATGCCGAGCGAGATCAA-3'        |
|               | R: 5'-CAGCCACATCTGTAACCTCCTCC-3'   |
| <i>Oct4</i>   | F: 5'-GATCACTCACATCGCCAATCA-3'     |
|               | R: 5'-CTGTAGCCTCATACTCTTCTCGTT-3'  |
| <i>Pax2</i>   | F: 5'-AACGGTGAGAAGAGGAAACG-3'      |
|               | R: 5'-CTGCTGCTGGGTGAAGGT-3'        |
| <i>Pax6</i>   | F: 5'-CACGTACAGTGCTTTGCCACC-3'     |
|               | R: 5'-TATCATAACTCCGCCATTCA-3'      |
| <i>Pitx2</i>  | F: 5'-ACCTTACGGAAGCCCGAGTC-3'      |
|               | R: 5'-CAAAGCCATTCTTGCACAGC-3'      |
| <i>Sox1</i>   | F: 5'-GGCGGCATCCCTTACG-3'          |
|               | R: 5'-GGCTCCGACTTGACCAGA-3'        |
| <i>Sox7</i>   | F: 5'-ATTACTCCCATGCCACCTACC-3'     |
|               | R: 5'-TGTCTCCCAGAAGTTCCACC-3'      |
| <i>Sox17</i>  | F: 5'-ATACGCCAGTGACGACCAGAG-3'     |
|               | R: 5'-CCTCGCCTTTCACCTTACATC-3'     |

**Table S1.** Primer sequences for qRT-PCRs.
